# Supplementary material for: Porphyrin-based covalent organic polymers connected by imine-bonds: efficient and recyclable heterogeneous photocatalysts for the oxidation of thioanisole
Source: Royal Society of Chemistry journal article supplement (doi:10.1039/d5nj03558a), 2025-01-01
Supplement: d5nj03558a1.pdf [file d5nj03558a1.pdf]

## Supporting Information

### **Porphyrin-based covalent organic polymers connected by imine-bonds: An efficient and recyclable heterogeneous photocatalyst for the oxidation of thioanisole**

Yahong Yao<sup>a,\*</sup>, Jun Li<sup>b</sup>, Jiaojiao Wei<sup>b,c</sup>, Jun Li<sup>b,\*</sup>

<sup>a</sup>School of Chemistry and chemical Engineering, Xi'an University of Architecture and Technology Xi'an, 710055, People's Republic of China

<sup>b</sup>Key Laboratory of Synthetic and Natural Functional Molecule of the Ministry of Education, College of Chemistry & Materials Science, Northwest University, Xi'an 710069, China

<sup>c</sup>Minmetals New Energy Materials (Hunan) Co.,Ltd., Changsha, 410221, China

Corresponding author: Yahong Yao([yaoyh@xauat.edu.cn](mailto:yaoyh@xauat.edu.cn)); Jun Li ([junli@nwu.edu.cn](mailto:junli@nwu.edu.cn))

#### **Synthesis of 5,10,15,20-tetrakis(4-hydroxyphenyl) porphyrin (H<sub>2</sub>THPP).**

A mixture of 4-hydroxybenzaldehyde (3.0 g, 0.025 mmol) was placed in propionic acid (80 mL), then freshly distilled pyrrole (1.65 mL, 0.025 mol) in 10mL of propionic acid was dropwise added to the mixture with stirring. After the mixture was continuously stirred for 1 h under reflux, the mixture was allowed to distill out of propionic acid. Added 50 ml of dichloromethane, cooled overnight and a purple crude product are collected by filtration. The crude product was purified by SiO<sub>2</sub> column chromatography (CH<sub>2</sub>Cl<sub>2</sub> / EtOH =10:1) to give purple porphyrin H<sub>2</sub>THPP. Yield: 20 %; MS, (m/z) calcd for [M + H]<sup>+</sup>: 679.20; UV-vis (C<sub>2</sub>H<sub>5</sub>OH):  $\lambda_{max}$  / nm: 421 (Soret band), 514, 551, 692, 647 (Q band).

#### **Synthesis of ZnTHPP.**

H<sub>2</sub>THPP (0.1356 g, 0.2 mmol), zinc acetate (1.317 g, 6mmol) were dissolved in a mixture of ethanol (20 ml) and dichloromethane (20 ml) and stirred for 48 h at room temperature. The aim of a 30-fold amount of zinc acetate to the porphyrin is to ensure full metallization of porphyrin under mild conditions. The crude product was purified by SiO<sub>2</sub> column chromatography (CH<sub>2</sub>Cl<sub>2</sub> / EtOH =25:2) to give porphyrin ZnTHPP. Yield: 38 %; MS, (m/z) calcd for [M + H]<sup>+</sup>: 743.2; UV-vis (C<sub>2</sub>H<sub>5</sub>OH):  $\lambda_{max}$  / nm: 428 (Soret band), 539, 587 (Q band).

### Synthesis of CoTHPP.

H<sub>2</sub>THPP (0.1356 g, 0.2 mmol), cobalt acetate (1.494 g, 6 mmol) were dissolved in a mixture of ethanol (20 ml) and dichloromethane (20 ml) and refluxed for 48 h by heating. The crude product was purified by SiO<sub>2</sub> column chromatography (CH<sub>2</sub>Cl<sub>2</sub> / EtOH =25:2) to give porphyrin CoTHPP. Yield: 27 %; MS, (m/z) calcd for [M + H]<sup>+</sup>: 736.3; UV-vis (CH<sub>2</sub>Cl<sub>2</sub>):  $\lambda_{max}$  / nm: 418 (Soret band), 533 (Q band).

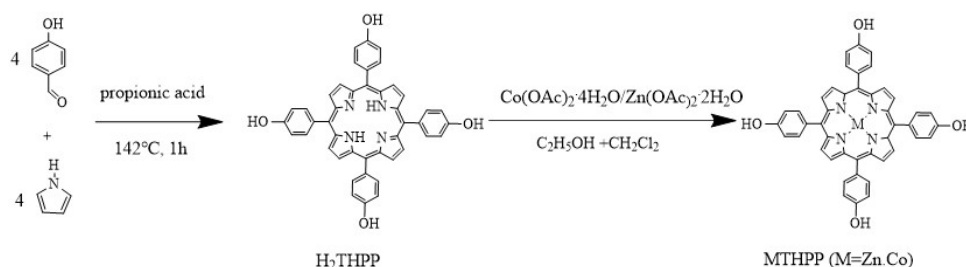

**SCHEME S1** Synthesis of MTHPP

### Synthesis of 5,10,15,20-[4-(4-Formyl) phenoxy] phenyl porphyrin (H<sub>2</sub>Pp)

H<sub>2</sub>THPP (0.136 g, 0.2 mmol) and 4-fluorobenzaldehyde (1.46 g, 2 mmol) were dissolved in N,N dimethylformamide (150 ml) and heated with a constant stirring under a nitrogen atmosphere. After that, K<sub>2</sub>CO<sub>3</sub> (0.691 g, 5 mmol) was added to the solution when the reaction reached reflux temperature. TLC was checked at the conclusion of the reaction. The crude product was purified by SiO<sub>2</sub> column chromatography (CH<sub>2</sub>Cl<sub>2</sub>/EtOH = 10:1) to give purple porphyrin H<sub>2</sub>Pp.

### Synthesis of ZnPp and CoPp

ZnPp and CoPp was synthesized in the same route as the preparation of H<sub>2</sub>Pp, only changed ZnTHPP and CoTHPP as the start material.

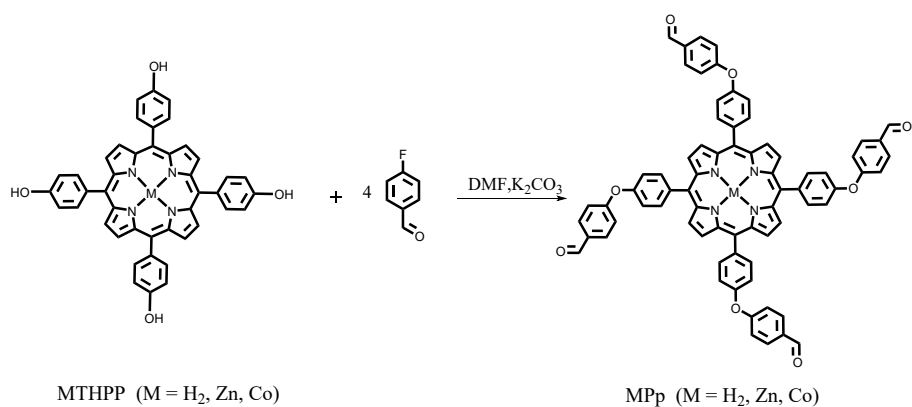

**SCHEME S2** Synthesis of MPp

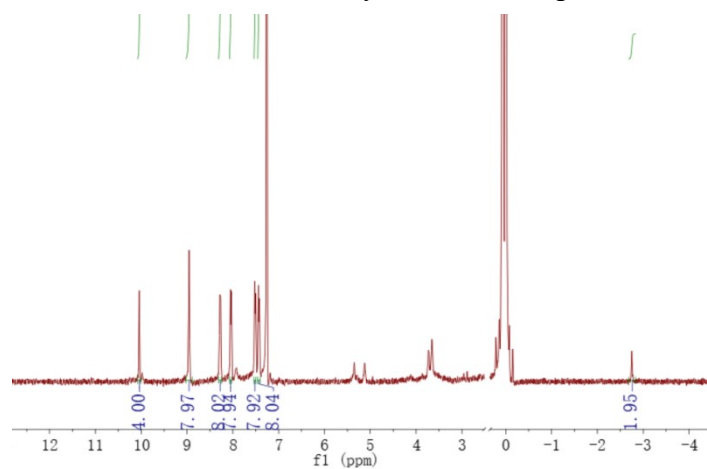

**FIGURE S1** <sup>1</sup>H NMR spectra of H<sub>2</sub>Pp taken at 400 MHz in CDCl<sub>3</sub>

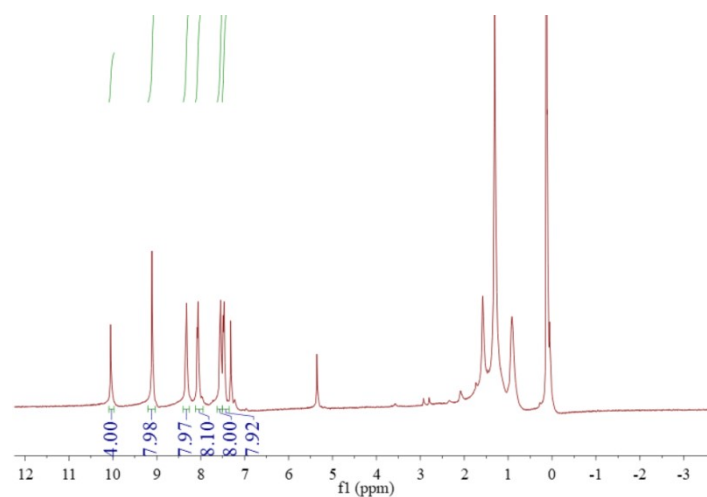

**FIGURE S2** <sup>1</sup>H NMR spectra of ZnPp taken at 400 MHz in CDCl<sub>3</sub>

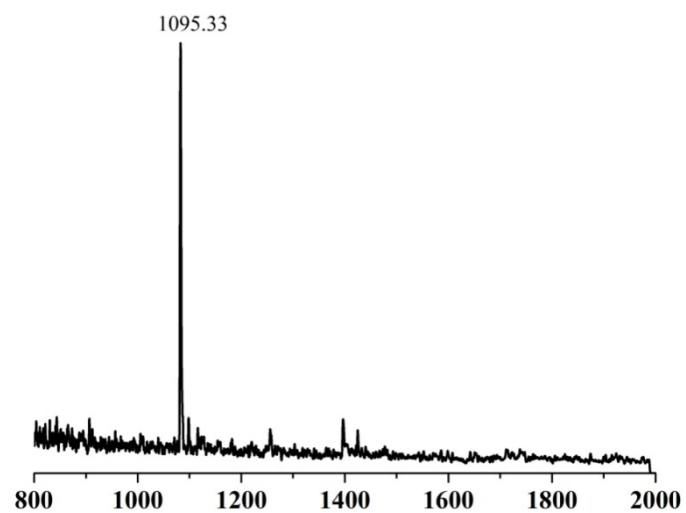

**FIGURE S3** MS of H<sub>2</sub>Pp

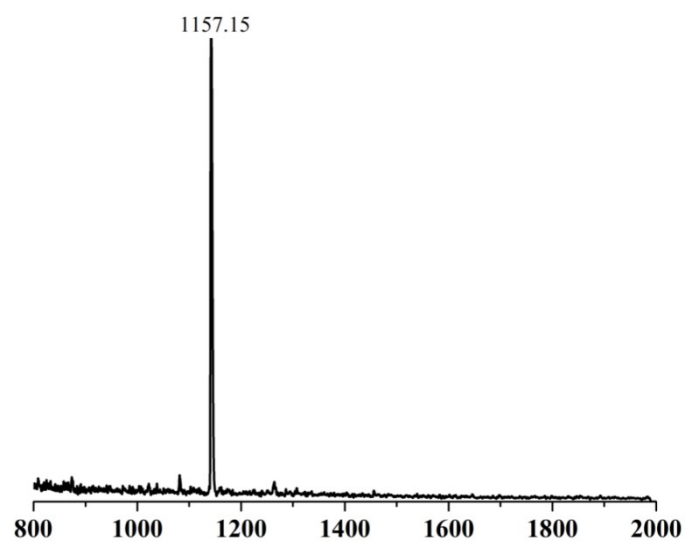

**FIGURE S4** MS of ZnPp

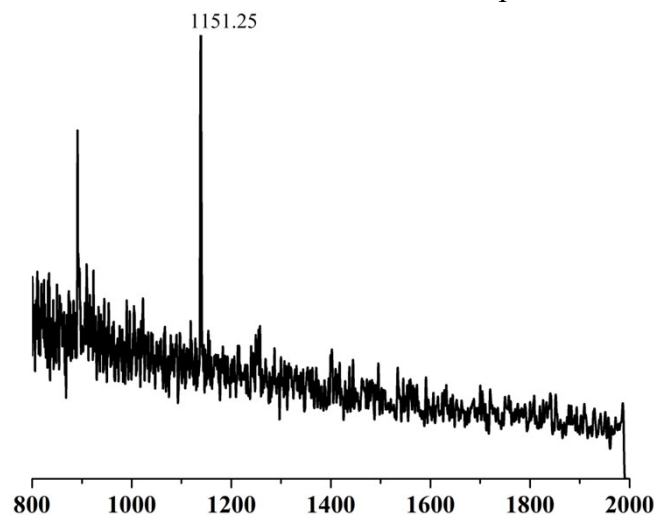

**FIGURE S5** MS of CoPp

**Table S1** UV-vis spectroscopy data of H<sub>2</sub>Pp、ZnPp and CoPp

| porphyrin         | Soret band ( nm ) | Q band ( nm )            |
|-------------------|-------------------|--------------------------|
| H <sub>2</sub> Pp | 420               | 515 , 551 , 590 ,<br>647 |
| CoPp              | 412               | 529                      |
| ZnPp              | 422               | 549 , 587                |

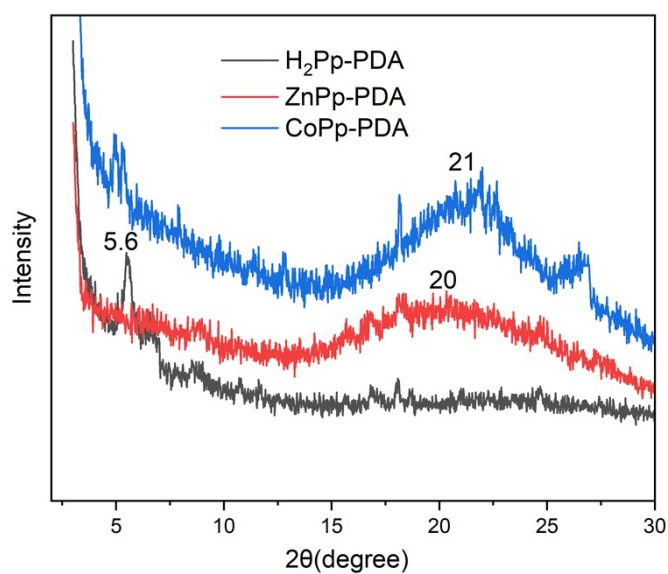**FIGURE S6** PXRD patterns of H<sub>2</sub>Pp-PDA (black curve), ZnPp-PDA (red curve) and CoPp-PDA (blue curve)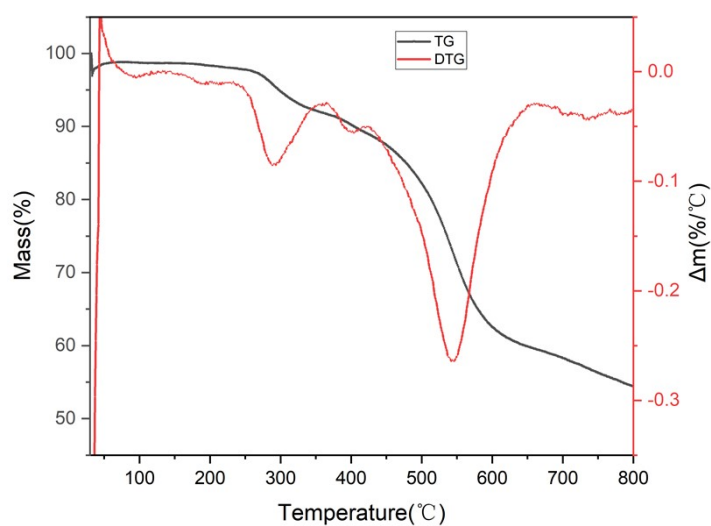**FIGURE S7** DTG curves of H<sub>2</sub>Pp-PDA

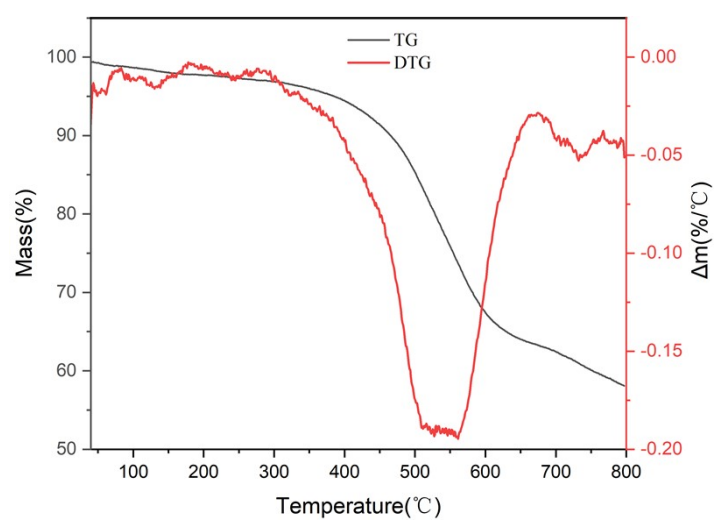

**FIGURE S8** DTG curves of ZnPp-PDA

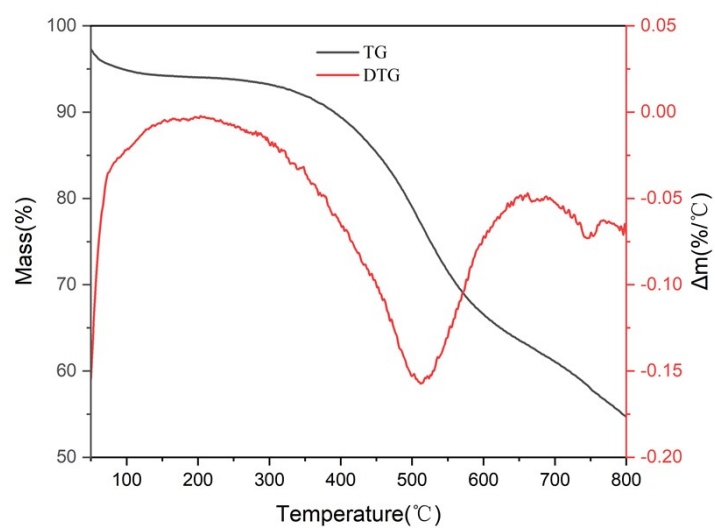

**FIGURE S9** DTG curves of CoPp-PDA
